# Supplementary material for: Unique aspects of transcriptional regulation in neurons – nuances in NFκB and Sp1-related factors
Source: PubMed Central journal article supplement (PMC2693111; doi:10.1186/1742-2094-6-16), 2009-05-18
Supplement: 1742-2094-6-16-S2.pdf [file 1742-2094-6-16-S2.pdf]

**Table S1. Primers for RT-PCR**

| Gene     | Primers <u>forward</u><br><u>reverse</u>                           | Cycles | Product (bp) |
|----------|--------------------------------------------------------------------|--------|--------------|
| RelA     | <u>CCC CTC CGC CTG ACC C</u><br>GGC GAT CGT CTG TGT CTG G          | 29     | 370          |
| IκBα     | <u>CCA CTC CGT CCT GCA GGC C</u><br>CGT AGG GCA ACT CAT CTT CC     | 27     | 391          |
| IκBβ     | <u>CTC AAT AAA CCG GAG CCT ACG</u><br>GCG CTC TGG TTG TCA GGT CTG  | 30     | 444          |
| IKK1     | <u>GGA ATC CCT GGA ACA GCG TG</u><br>CGT CTC GCC ATC TTG AGG       | 29     | 423          |
| IKK2     | <u>GCT GTG TCC TTC AGG AGC C</u><br>GTC CTT TGG TCT CTT GGC        | 33     | 517          |
| IKK3     | <u>GAG GGA AGG ATT CGA GCA</u><br>CCT CAA TCC TGG CTG ACT          | 9      | 541          |
| NIK      | <u>GAG CCC ATC CAC CGA GCA</u><br>GCA CGC CGG AAC TCA GGG T        | 30     | 555          |
| β-actin  | <u>GTC CTC TCC ATG TGG TTT TC</u><br>GCT GCG CTC TCG TAA TTG TG    | 21     | 439          |
| GAPDH    | <u>GAA CGG ATT GGC CGT ATC G</u><br>TGG GGG TAG GAA CAC GGA A      | 23     | 692          |
| Cycloph. | <u>CA AGT CCA TCT ACG GAG AGA A</u><br>GCA ATC CTG CTA GAC TTA AGG | 23     | 433          |
| Sp1      | <u>CCC CAG GTG ATC ATG GAG C</u><br>CTT CTC TCC TGT ATG TCT ACG    | 30     | 383          |
| Sp3      | <u>CGG AGG GTA GCT TGC ACC TG</u><br>GGA TGT CTT GAT TGC TGG TGG C | 28     | 446          |
| Sp4      | <u>GGG ATG AGC GAT CAG AAG AAG G</u><br>CCA CCG TCT GAA GTT GGG GG | 32     | 520          |
